# Supplementary material for: Construction and analysis of a plant non-specific lipid transfer protein database (nsLTPDB)
Source: PubMed Central journal article supplement (PMC3303721; doi:10.1186/1471-2164-13-s1-s9), 2012-01-17
Supplement: 1471-2164-13-S1-S9-S1.pdf [file 1471-2164-13-S1-S9-S1.pdf]

### The difference between nsLTP1 and nsLTP2.

| Type               | nsLTP1                                                                                                                                                                                                                  | nsLTP2                                                                                                                                                                                                                   |
|--------------------|-------------------------------------------------------------------------------------------------------------------------------------------------------------------------------------------------------------------------|--------------------------------------------------------------------------------------------------------------------------------------------------------------------------------------------------------------------------|
| Molecular weight   | 9 kDa                                                                                                                                                                                                                   | 7 kDa                                                                                                                                                                                                                    |
| Disulfide bond     | 4 disulfide bonds<br>-C [hydrophilic residues] C-                                                                                                                                                                       | 4 disulfide bonds<br>-C [hydrophobic residues] C-                                                                                                                                                                        |
| 8-Cys patterns     | 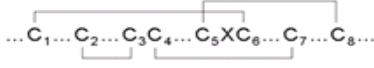 <p>...C<sub>1</sub>...C<sub>2</sub>...C<sub>3</sub>C<sub>4</sub>...C<sub>5</sub>XC<sub>6</sub>...C<sub>7</sub>...C<sub>8</sub>...</p> |  <p>...C<sub>1</sub>...C<sub>2</sub>...C<sub>3</sub>C<sub>4</sub>...C<sub>5</sub>XC<sub>6</sub>...C<sub>7</sub>...C<sub>8</sub>...</p> |
| Hydrophobic cavity | Big                                                                                                                                                                                                                     | Small                                                                                                                                                                                                                    |
| Structure          |                                                                                                                                       |                                                                                                                                       |
