# Supplementary material for: Construction and analysis of a plant non-specific lipid transfer protein database (nsLTPDB)
Source: PubMed Central journal article supplement (PMC3303721; doi:10.1186/1471-2164-13-s1-s9), 2012-01-17
Supplement: 1471-2164-13-S1-S9-S2.pdf [file 1471-2164-13-S1-S9-S2.pdf]

## Diversity of the eight cysteine motif in various types of nsLTPs.

| 8CM and number of flanking amino acid residues |                       |   |                   |   |                       |     |                    |     |                       |   |                      |   |                      |
|------------------------------------------------|-----------------------|---|-------------------|---|-----------------------|-----|--------------------|-----|-----------------------|---|----------------------|---|----------------------|
| Type                                           |                       | 1 |                   | 2 |                       | 3,4 |                    | 5 6 |                       | 7 |                      | 8 |                      |
| I                                              | X <sub>2-9</sub>      | C | X <sub>9</sub>    | C | X <sub>13-15</sub>    | CC  | X <sub>19</sub>    | CXC | X <sub>19-24</sub>    | C | X <sub>7,13,14</sub> | C | X <sub>0-26</sub>    |
| II                                             | X <sub>0-13</sub>     | C | X <sub>7</sub>    | C | X <sub>13,15</sub>    | CC  | X <sub>8-10</sub>  | CXC | X <sub>16,21,23</sub> | C | X <sub>5,6</sub>     | C | X <sub>0-2</sub>     |
| III                                            | X <sub>2-7</sub>      | C | X <sub>9</sub>    | C | X <sub>14,16,19</sub> | CC  | X <sub>9</sub>     | CXC | X <sub>12</sub>       | C | X <sub>6</sub>       | C | X <sub>1,2,4</sub>   |
| IV                                             | X <sub>0-7</sub>      | C | X <sub>9,10</sub> | C | X <sub>15-17</sub>    | CC  | X <sub>9</sub>     | CXC | X <sub>21-24,28</sub> | C | X <sub>6-8,10</sub>  | C | X <sub>0,1,5</sub>   |
| V                                              | X <sub>2-5,10</sub>   | C | X <sub>14</sub>   | C | X <sub>14</sub>       | CC  | X <sub>11-13</sub> | CXC | X <sub>24</sub>       | C | X <sub>10</sub>      | C | X <sub>6,10,12</sub> |
| VI                                             | X <sub>2-17</sub>     | C | X <sub>10</sub>   | C | X <sub>16,17</sub>    | CC  | X <sub>9</sub>     | CXC | X <sub>22,23</sub>    | C | X <sub>7,9</sub>     | C | X <sub>5-12</sub>    |
| VII                                            | X <sub>4,50</sub>     | C | X <sub>9</sub>    | C | X <sub>15</sub>       | CC  | X <sub>12</sub>    | CXC | X <sub>27</sub>       | C | X <sub>9,11</sub>    | C | X <sub>17,18</sub>   |
| VIII                                           | X <sub>13,12,21</sub> | C | X <sub>6</sub>    | C | X <sub>13,14</sub>    | CC  | X <sub>12</sub>    | CXC | X <sub>25</sub>       | C | X <sub>8</sub>       | C | X <sub>2,14,16</sub> |
| IX                                             | X <sub>2,21</sub>     | C | X <sub>13</sub>   | C | X <sub>15</sub>       | CC  | X <sub>9</sub>     | CXC | X <sub>22</sub>       | C | X <sub>6</sub>       | C | X <sub>1,4</sub>     |

Adopted from the Figure 5 by Gautier, *et al.* in [33]. Species examined are rice, arabidopsis and wheat.

| 8CM and number of flanking amino acid residues |                          |   |                 |   |                       |     |                               |     |                    |   |                       |   |                        |
|------------------------------------------------|--------------------------|---|-----------------|---|-----------------------|-----|-------------------------------|-----|--------------------|---|-----------------------|---|------------------------|
| Type                                           |                          | 1 |                 | 2 |                       | 3,4 |                               | 5 6 |                    | 7 |                       | 8 |                        |
| Ia                                             | X <sub>3,4,6,14,15</sub> | C | X <sub>9</sub>  | C | X <sub>13-16</sub>    | CC  | X <sub>19</sub>               | CXC | X <sub>22,23</sub> | C | X <sub>10,13,14</sub> | C | X <sub>1,4,7</sub>     |
| Ib                                             | X <sub>2,3,10,12</sub>   | C | X <sub>9</sub>  | C | X <sub>13</sub>       | CC  | X <sub>19</sub>               | CXC | X <sub>22</sub>    | C | X <sub>13</sub>       | C | X <sub>4,5</sub>       |
| Ic                                             | X <sub>3</sub>           | C | X <sub>9</sub>  | C | X <sub>14</sub>       | CC  | X <sub>2CX<sub>16</sub></sub> | CXC | X <sub>21</sub>    | C | X <sub>13</sub>       | C | X <sub>4</sub>         |
| Id                                             | X <sub>4</sub>           | C | X <sub>9</sub>  | C | X <sub>13,16,17</sub> | CC  | X <sub>19</sub>               | CXC | X <sub>22,23</sub> | C | X <sub>14</sub>       | C | X <sub>6,15</sub>      |
| II                                             | X <sub>2</sub>           | C | X <sub>7</sub>  | C | X <sub>13</sub>       | CC  | X <sub>8</sub>                | CXC | X <sub>23</sub>    | C | X <sub>6</sub>        | C | X <sub>0</sub>         |
| IV                                             | X <sub>3</sub>           | C | X <sub>9</sub>  | C | X <sub>15</sub>       | CC  | X <sub>9</sub>                | CXC | X <sub>24</sub>    | C | X <sub>7</sub>        | C | X <sub>0</sub>         |
| IX                                             | X <sub>2</sub>           | C | X <sub>13</sub> | C | X <sub>15</sub>       | CC  | X <sub>9</sub>                | CXC | X <sub>22</sub>    | C | X <sub>6</sub>        | C | X <sub>4</sub>         |
| X                                              | X <sub>2,3,12</sub>      | C | X <sub>9</sub>  | C | X <sub>12,14</sub>    | CC  | X <sub>6,9,20</sub>           | CXC | X <sub>22,25</sub> | C | X <sub>13,14</sub>    | C | X <sub>4,6,16,17</sub> |

Adopted from the Table 2 by Liu, *et al.* in [34]. Species examined was only Solanaceae.

| 8CM and number of flanking amino acid residues |  |   |                    |   |                       |     |                    |     |                       |   |                   |   |  |
|------------------------------------------------|--|---|--------------------|---|-----------------------|-----|--------------------|-----|-----------------------|---|-------------------|---|--|
| Type                                           |  | 1 |                    | 2 |                       | 3,4 |                    | 5 6 |                       | 7 |                   | 8 |  |
| 1                                              |  | C | X <sub>8,9</sub>   | C | X <sub>13-17</sub>    | CC  | X <sub>18-20</sub> | CXC | X <sub>19-24</sub>    | C | X <sub>7-14</sub> | C |  |
| 2                                              |  | C | X <sub>7</sub>     | C | X <sub>13,15</sub>    | CC  | X <sub>8-10</sub>  | CXC | X <sub>16,21,23</sub> | C | X <sub>5-6</sub>  | C |  |
| C                                              |  | C | X <sub>9</sub>     | C | X <sub>14,16,19</sub> | CC  | X <sub>9</sub>     | CXC | X <sub>12</sub>       | C | X <sub>6</sub>    | C |  |
| D                                              |  | C | X <sub>6,14</sub>  | C | X <sub>8-18</sub>     | CC  | X <sub>9-17</sub>  | CXC | X <sub>19-28</sub>    | C | X <sub>6-14</sub> | C |  |
| E                                              |  | C | X <sub>11,13</sub> | C | X <sub>15-16</sub>    | CC  | X <sub>9</sub>     | CXC | X <sub>21-26</sub>    | C | X <sub>6-7</sub>  | C |  |

|   |   |                    |   |                    |    |                    |     |                    |   |                   |   |
|---|---|--------------------|---|--------------------|----|--------------------|-----|--------------------|---|-------------------|---|
| F | C | X <sub>7</sub>     | C | X <sub>11</sub>    | CC | X <sub>10</sub>    | CXC | X <sub>19</sub>    | C | X <sub>9</sub>    | C |
| G | C | X <sub>6-11</sub>  | C | X <sub>14-19</sub> | CC | X <sub>12-13</sub> | CXC | X <sub>20-34</sub> | C | X <sub>5-12</sub> | C |
| H | C | X <sub>8,11</sub>  | C | X <sub>13,16</sub> | CC | X <sub>9</sub>     | CXC | X <sub>21</sub>    | C | X <sub>9</sub>    | C |
| J | C | X <sub>11,14</sub> | C | X <sub>14-15</sub> | CC | X <sub>12</sub>    | CXC | X <sub>20-22</sub> | C | X <sub>6</sub>    | C |
| K | C | X <sub>11</sub>    | C | X <sub>14</sub>    | CC | X <sub>13</sub>    | CXC | X <sub>24</sub>    | C | X <sub>7</sub>    | C |

Adopted from the Table 1 by Edstam, *et al.* in [53].
