# Supplementary material for: Construction and analysis of a plant non-specific lipid transfer protein database (nsLTPDB)
Source: PubMed Central journal article supplement (PMC3303721; doi:10.1186/1471-2164-13-s1-s9), 2012-01-17

Distribution of (A) Mw, (B) pI, (C) CXC, and (D) net charge of the five types of nsLTPs defined in this work. Note that in figure (C) X represents a number of intervening residues between two conserved cysteines.

(A)

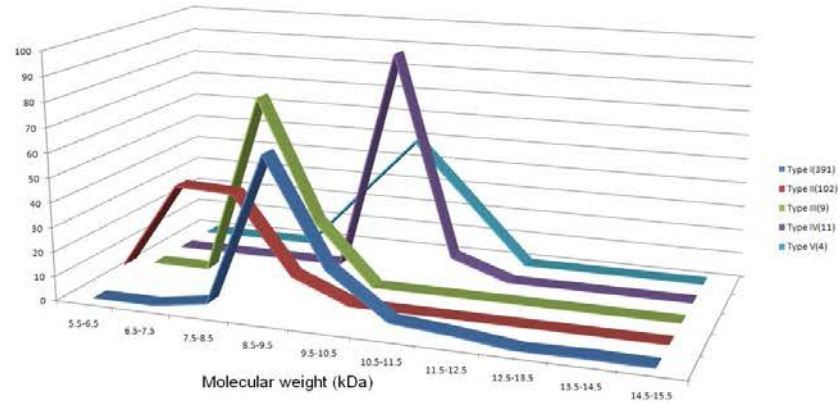

(B)

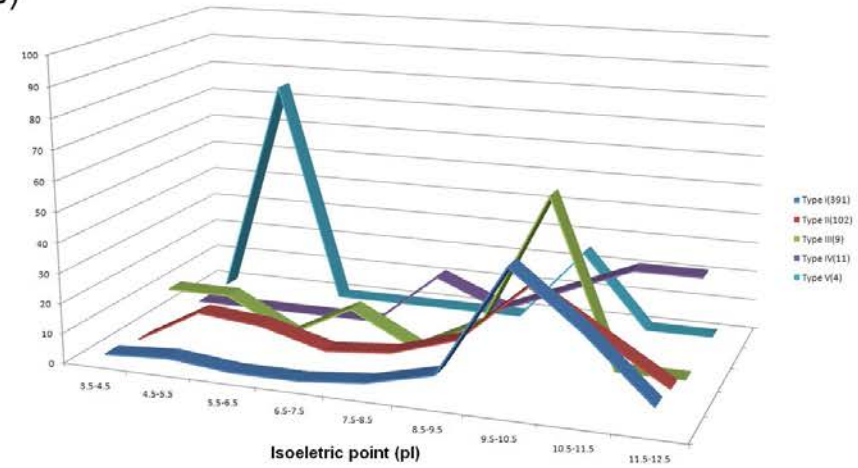

(C)

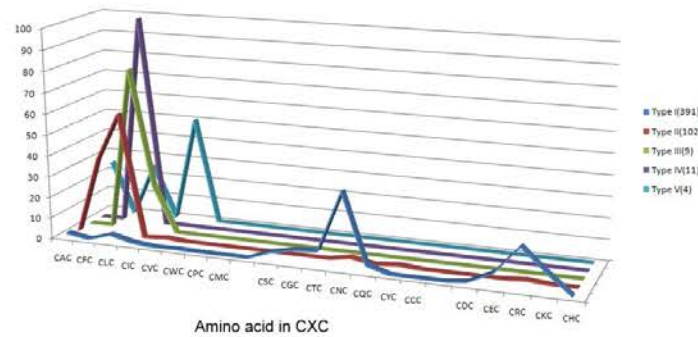

(D)

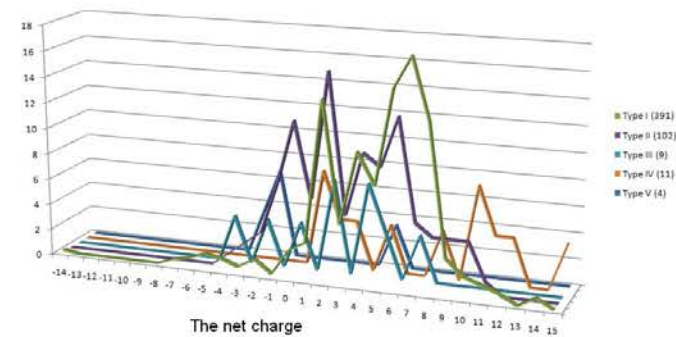

Supplement: 1471-2164-13-S1-S9-S3.pdf [file 1471-2164-13-S1-S9-S3.pdf]
