# Supplementary material for: Construction and analysis of a plant non-specific lipid transfer protein database (nsLTPDB)
Source: PubMed Central journal article supplement (PMC3303721; doi:10.1186/1471-2164-13-s1-s9), 2012-01-17

The unrooted phylogenetic tree constructed with the UPGMA clustering algorithm.

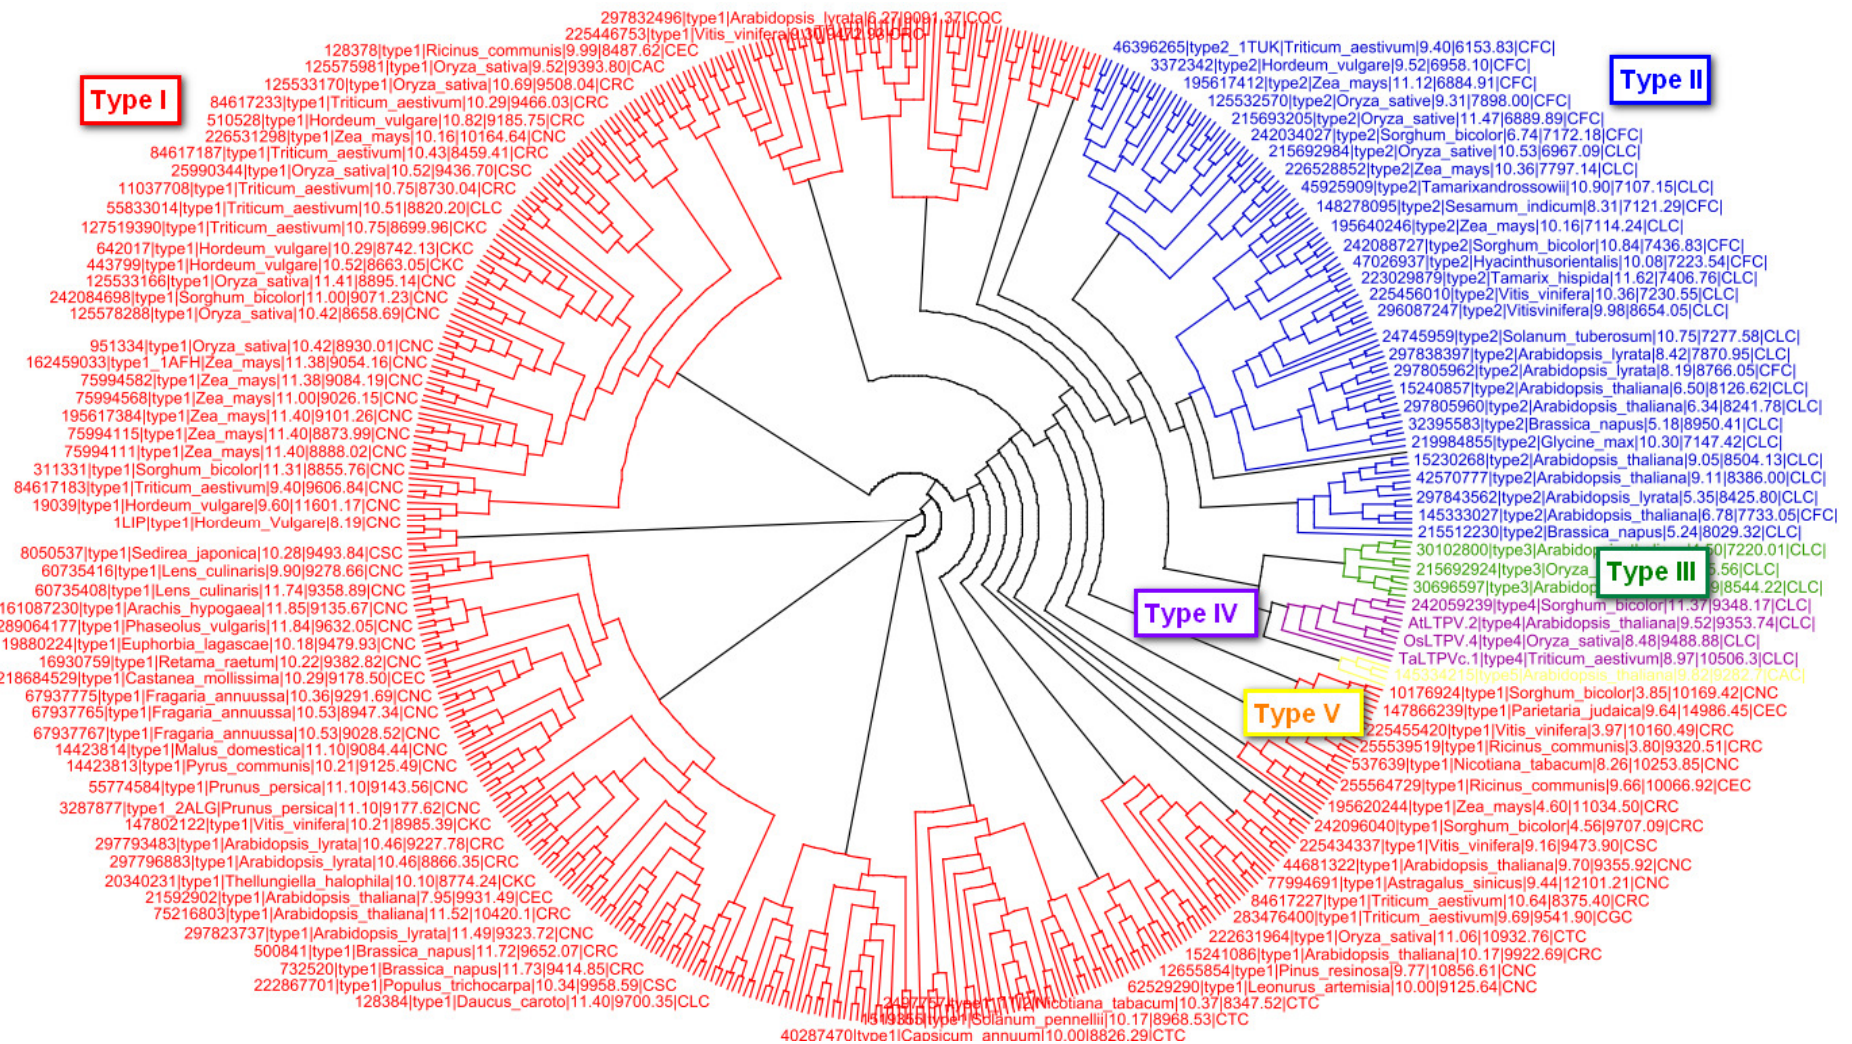

Supplement: 1471-2164-13-S1-S9-S4.pdf [file 1471-2164-13-S1-S9-S4.pdf]
